# Supplementary material
Source: PubMed Central journal article supplement (PMC5702732)

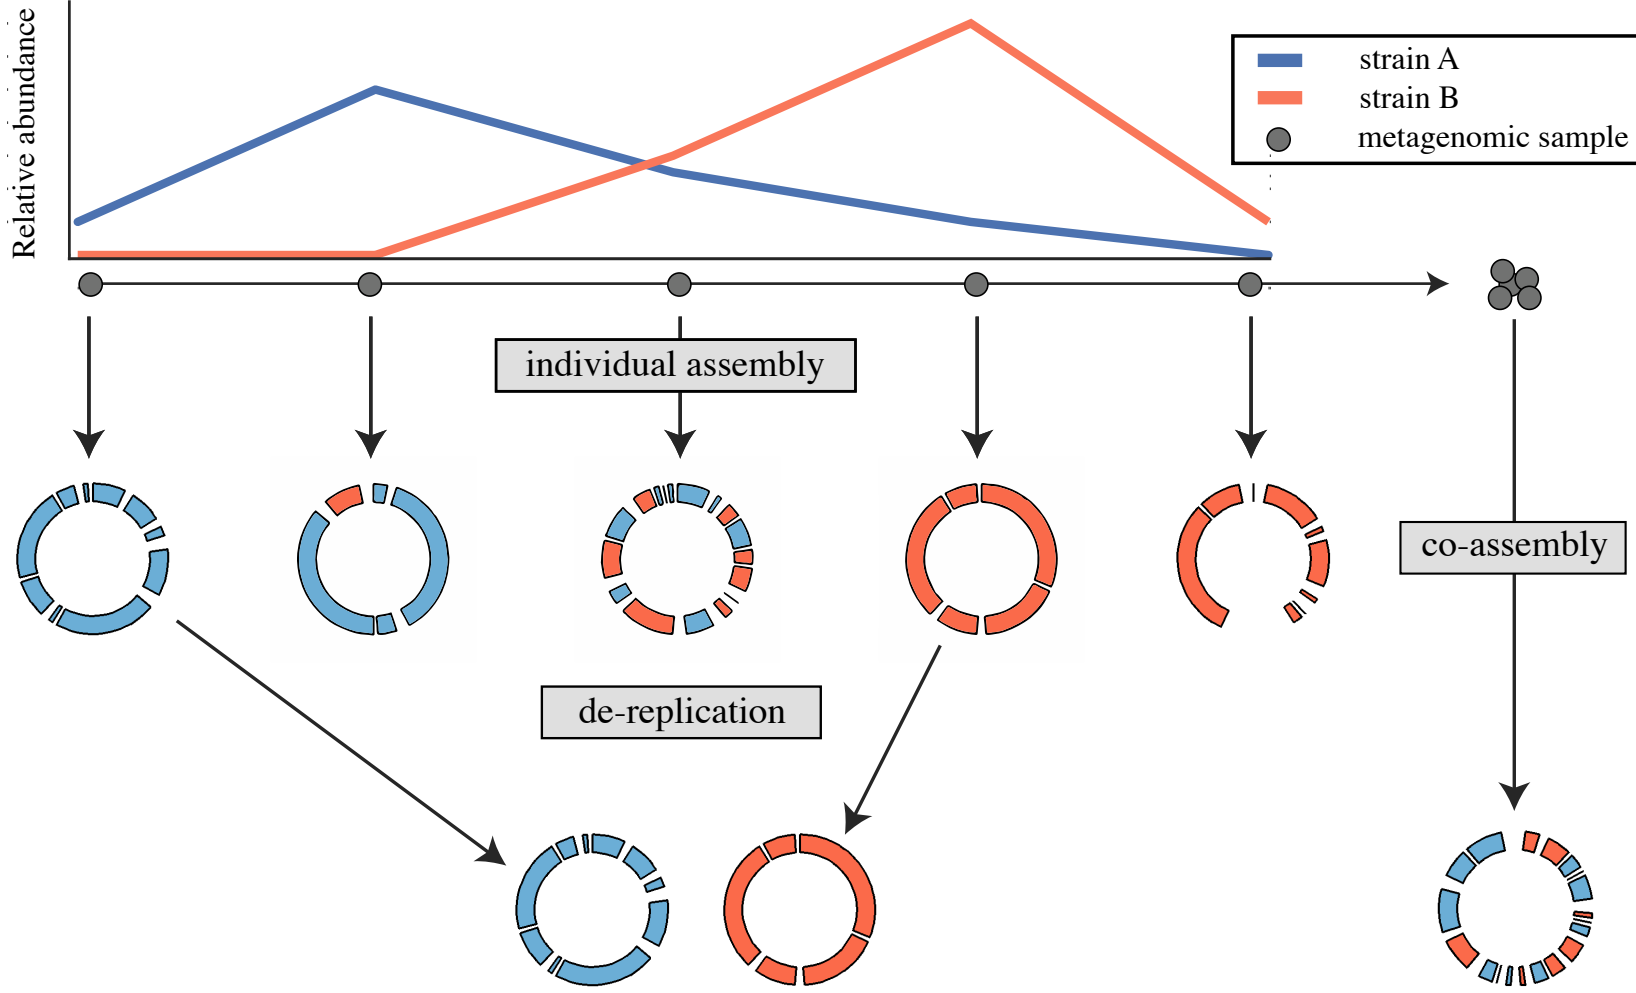

Supplement: ismej2017126x1.pdf [file ismej2017126x1.pdf]

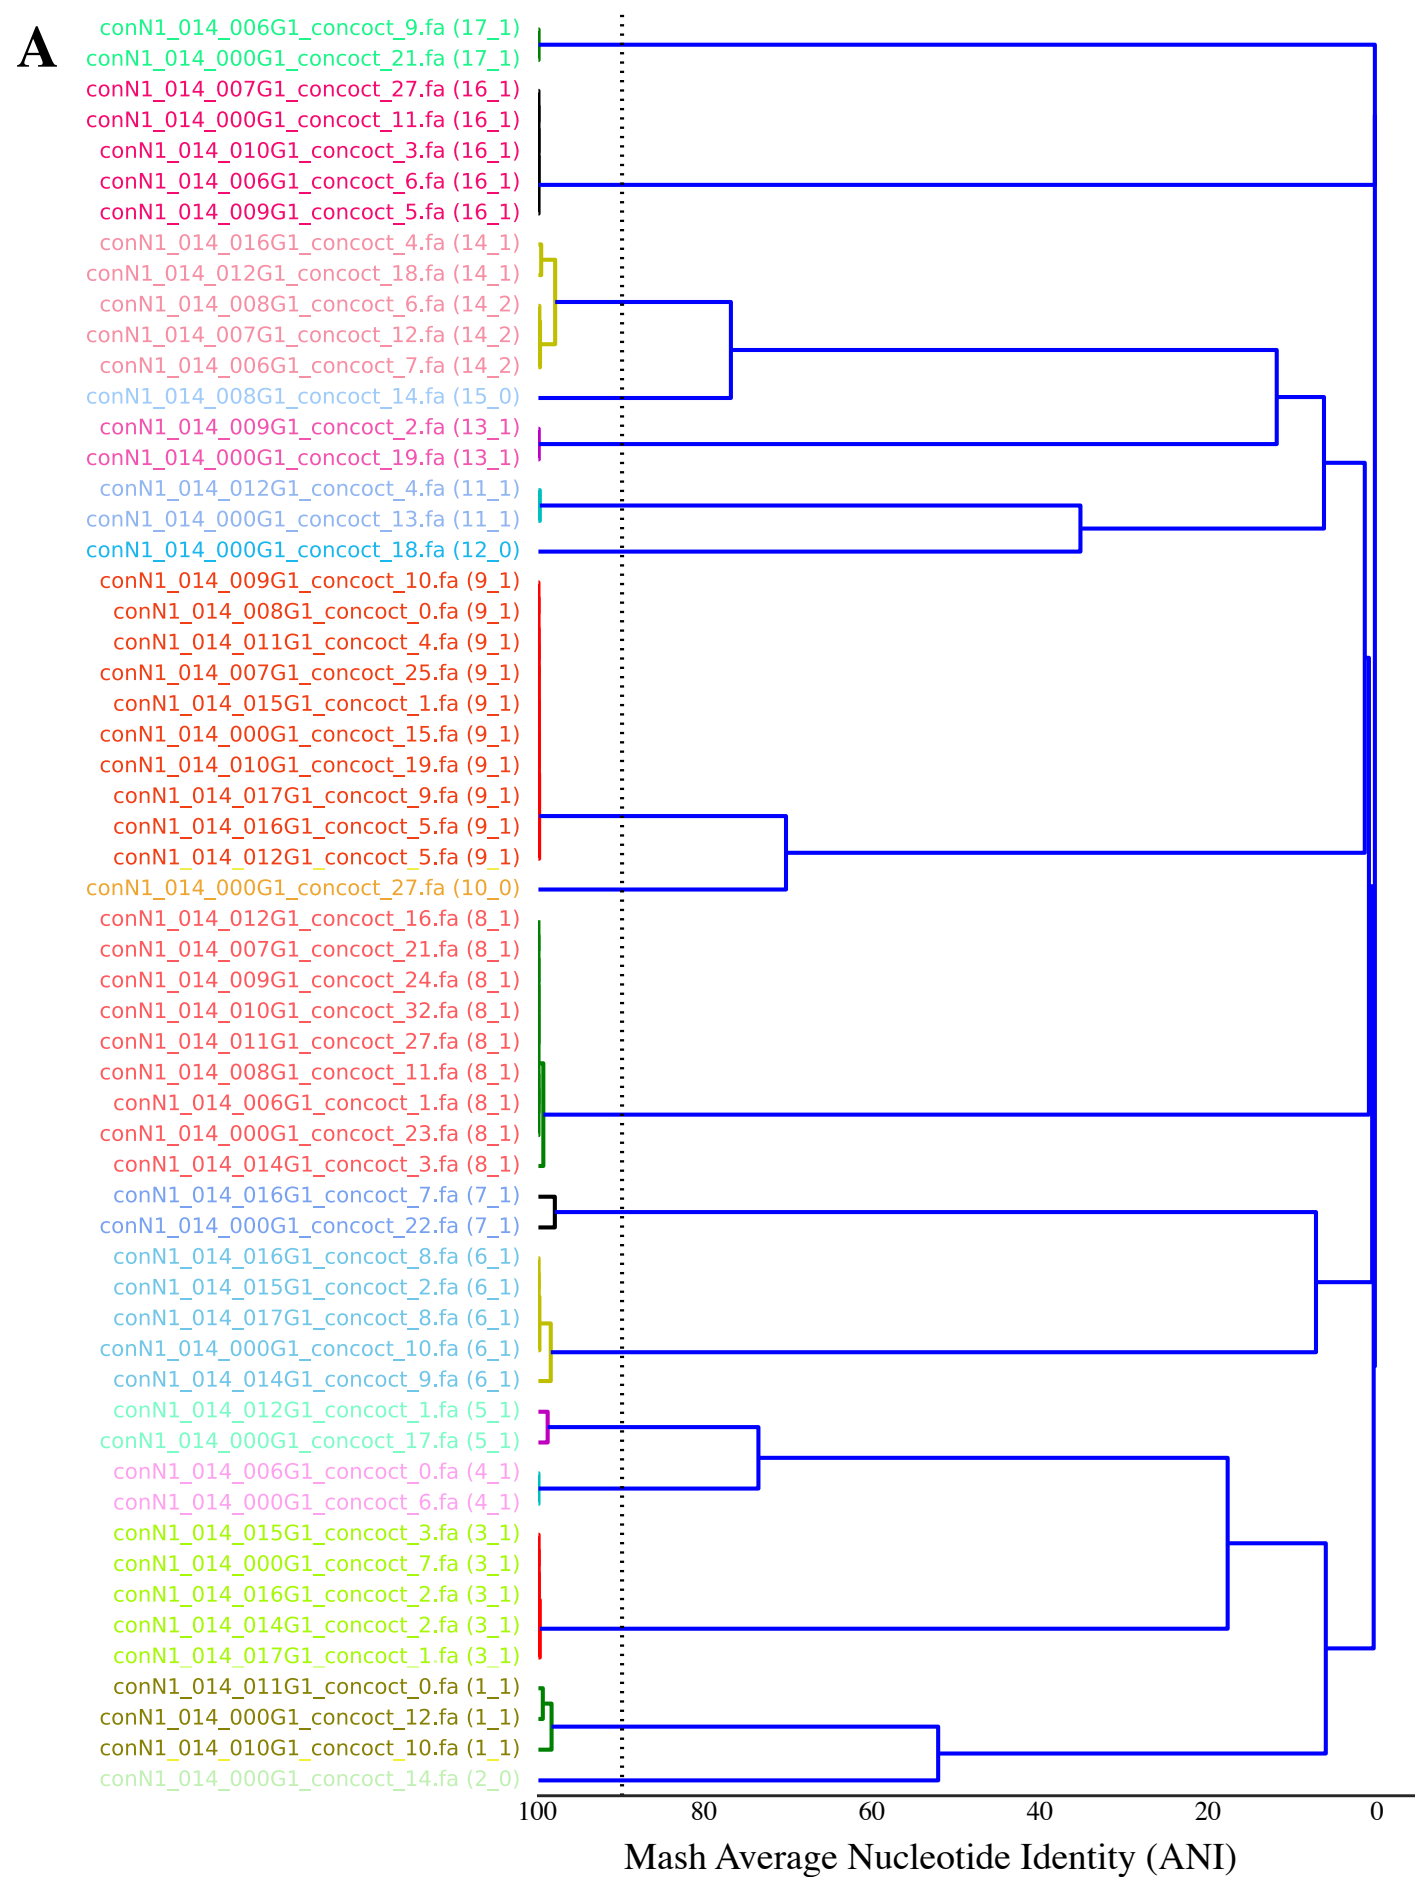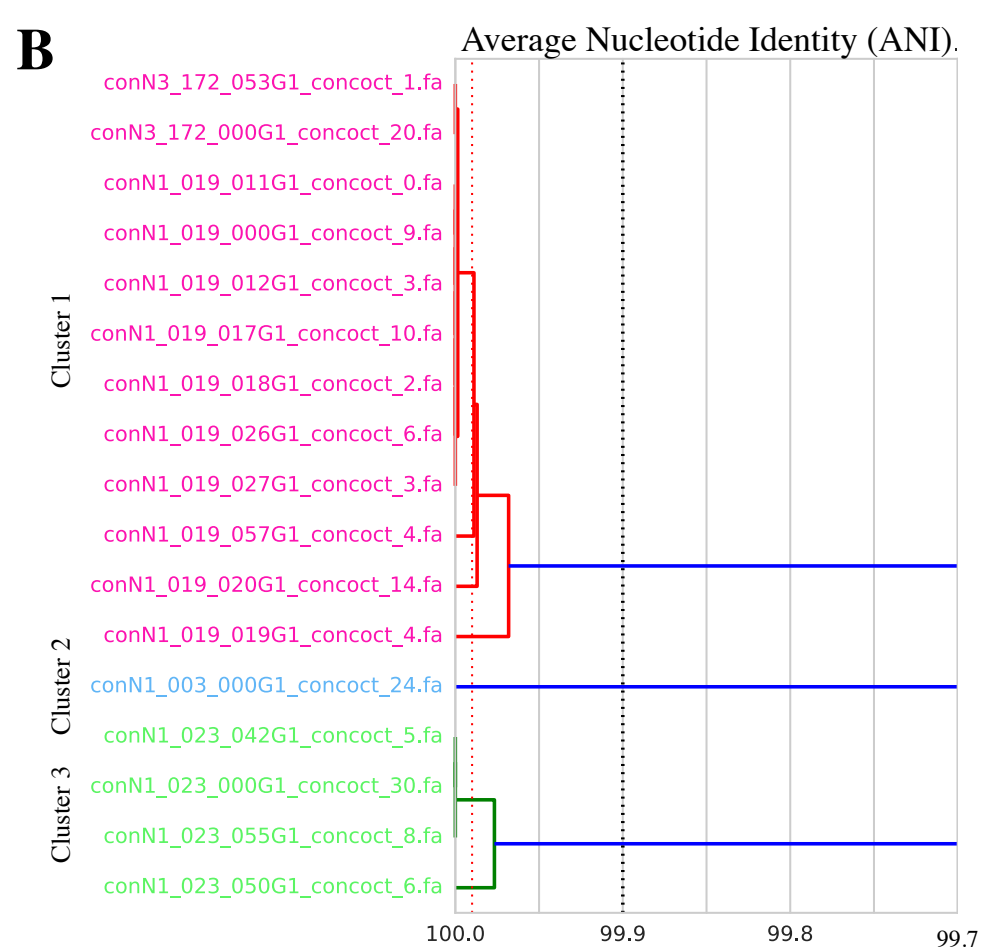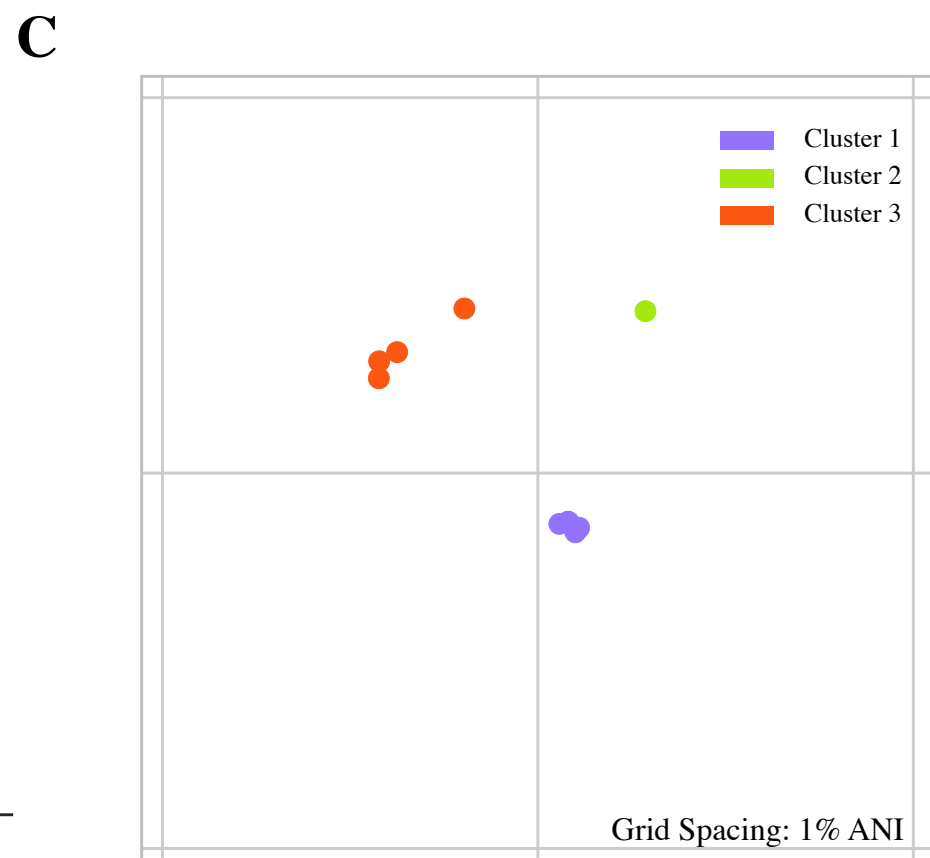

Supplement: ismej2017126x2.pdf [file ismej2017126x2.pdf]
